# Supplementary material for: Elemental Segregation at LLZO Grain Boundaries: Eliminating Its Detrimental Role in Conductivity and Lithium Nucleation
Source: Research Square preprint supplement (doi:10.21203/rs.3.rs-7887285/v1), 2025-12-19
Supplement: Supplementary file 1 [file cc9acae8483cdd0ee9ce98bb.docx]

**Elemental Segregation at LLZO Grain Boundaries: Eliminating Its Detrimental Role in Conductivity and Lithium Nucleation**

Kai Yao, Kwangnam Kim*, Dylan Jennings, Jan Dippell, Meng Ma, Xingyu Liu, Qianli Ma, Walter Sebastian Scheld, Christoph Roitzheim, Yuan Zeng, Timo Danner, Olivier Guillon, Mark Huijben, Johan E. ten Elshof, Liwen F. Wan, Arnulf Latz, Brandon C. Wood, Martin Finsterbusch and Dina Fattakhova-Rohlfing*

Forschungszentrum Jülich GmbH, Institute of Energy Materials and Devices: Materials Synthesis and Processing (IMD-2), Wilhelm-Johnen-Straße, 52428 Jülich, Germany

University Duisburg-Essen, Faculty of Engineering and Center for Nanointegration Duisburg-Essen CENIDE, Lotharstraße 1, 47057 Duisburg, Germany

Laboratory for Energy Applications for the Future, Lawrence Livermore National Laboratory 7000 East Ave, Livermore, CA 94550, USA

German Aerospace Center, Institute of Engineering Thermodynamics, Pfaffenwaldring 38-40, Stuttgart, 70569, Germany

Helmholtz Institute Ulm for Electrochemical Energy Storage, Helmholtzstraße 11, Ulm, 89081, Germany

Forschungszentrum Jülich GmbH, Ernst-Ruska Centre for Microscopy and Spectroscopy with Electrons (ER-C), Wilhelm-Johnen-Straße, 52428 Jülich, Germany

Faculty of Physics and Astronomy, Advanced Transmission Electron Microscopy, Ruhr University Bochum, Bochum, 44801, Germany

Frontiers Science Center for Flexible Electronics, Xi’an Institute of Flexible Electronics and Xi’an Institute of Biomedical Materials & Engineering, Northwestern Polytechnical University, Xi’an 710072, PR China

Forschungszentrum Jülich GmbH, Institute of Energy Materials and Devices: Structure and Function of Materials (IMD-1), Wilhelm-Johnen-Straße, 52428 Jülich, Germany

MESA+ Institute for Nanotechnology, University of Twente, PO Box 217, 7500 AE Enschede, the Netherlands

Helmholtz Institute Münster: Ionics in Energy Storage (IEK-12), Forschungszentrum Jülich GmbH, Corrensstr. 46, 48149 Münster, Germany

Jülich-Aachen Research Alliance: JARA-Energy, 52425, Jülich, Germany

**Supplementary Fig. 1** | **Conventional sintering of LLZO. a**,Relative densities and Li concentrations of LLZO as a function of sintering time. **b**,SEM-EDS images of the cross-section of S-LLZO. The scale bars are 5 μm. The elemental distributions of Ta, Al and La exhibit local inhomogeneities in the images.

**Supplementary Fig. 2** | **MLFF-MD for Ta, Al and La migration. a**, All GBs for simulations. All GB models were constructed based on the [001], [011], and [111] orientations. For charge balance, each Ta substitution for Zr compensated by removing one Li, and each Al substitution for Li compensated by removing two Li atoms. The GB models were equilibrated at 1100 K using NPT for 10 ns, followed by relaxation using the MLFF. **b**, Formation energy calculations of Ta and La at Li 24d and 96h sites. For Ta and La substitution, closest Li are removed to account for charge compensation. Note that a Li ion occupies Ta/La vacancy to lower the total energy of the system (i.e., Li-Ta and Li-La site exchange for the Frenkel defect formation). **c**, MSD of Al, Ta and La. MLFF-MD simulations were conducted on bulk LLZO and three GBs, with doping ratios set at approximately 0.5 for Al and Ta per formula unit. For each result, the MSD was averaged across 10 randomly generated doping configurations. **d**, Positional probability density of Al diffusion in Li5.5Al0.5La3Zr2O12, Ta diffusion in Li6.5La3Zr1.5Ta0.5O12 and La diffusion in Li6.25La3.25Zr2O12 at 1800 K. The purple and yellow polyhedra correspond to the coordination structures of Zr and La, respectively. **e**, MSD and Arrhenius plot of La from AIMD simulations.

**Supplementary Fig. 3** | **FAST/SPS.** **a**, Equipment schematic diagram. This technique operates within an integrated system. It allows for precise control of sintering parameters and real-time monitoring of the sample status and evolution during processing. The pressed powder is heated directly in a graphite die. Since the sample is confined in a cylindrical die, the deformation of the sample occurs only in the z-axis direction, resulting in the displacement of the sample. The chamber is continuously evacuated, and the pressure change within the chamber reflects the gas exhausting from the sample during sintering. Both the sample displacement and chamber pressure can be recorded to analyze the sintering behavior of ceramics. After the mother powder is loaded, the pressure in the chamber is evacuated to below 100 Pa and an external pressure (up to 58 Mpa) is then applied to the sample, leading to an initial increase in displacement. The sample is subsequently heated to 400 oC within seconds as the starting temperature, during which a peak is recorded on the pressure curve as the gas within the sample is expelled due to thermal expansion. Afterwards, the sample was heated linearly with 20-80 oC min-1 until sintering finish. **b**, Photo of the die during high temperature sintering. **c**, Sintering examples of Na3.4Zr2Si2.4P0.6O12 and Li1.3Al0.3Ti1.7(PO4)3 demonstrating how pressure and displacement curves can be used to understand sintering behavior and determine sintering completion through inflection points. Once the experiment is completed, cooling begins immediately, allowing the sample to cool down to below 100 ℃ within 20 min.

**Supplementary Fig. 4** | **Characterizations of SF-LLZO.** **a**, SXRD refinement of SF-LLZO. The synchrotron diffraction wavelength is 0.4592 Å. **b**, Elements valence analysis.A comparison of SF-LLZO and S-LLZO reveals that all elemental spectra overlap significantly, with no observable peak shifts. This indicates that the elemental valence states in SF-LLZO are identical to those in S-LLZO. **c**, Particle size statistics of SF-LLZO and mother powder. **d**, SEM-EDS images of the cross-section of SF-LLZO. The scale bars are 10 μm. **e**, Representative HAADF-STEM image and STEM-EDS mappings of the GB of annealed SF-LLZO in air at 1000 ℃ for 1 h. The scale bars are 3 nm.

**Supplementary Fig. 5** | **MLFF-MD for Li transport. a**,**b**,**c**,GB Σ17 (530) [001] (**a**), Σ33 (52-2) [011] (**b**), Σ19 (32-5) [111] (**c**), and corresponding Ta concentrations assigned as well as isosurfaces of Li possibilities at 1100 K for 1 ns with Ta segregation and no segregation cases. **d**, Arrhenius plots across temperatures 700, 900 and 1000 K. **e**,RDFs of Zr-Li and Ta-Li. **f**, DFT-calculated chemical potential differences between the GB area and grain interior regions in small GB models: Σ5 (120) [001], Σ3 (1-11) [011], and Σ3 (1-21) [111] with and without Ta doping. The differences were calculated by Δμ = (μGB - μbulk average). **g**, DFT-calculated chemical potential differences between cubic and amorphous LLZO structures, with and without Ta doping. Green, yellow, cyan, purple, and blue spheres represent Li, La, Ta, Zr, and O, respectively.

**Supplementary Fig. 6** | **Li-rich phase deposition. a**, Li metal deposition from Al, Ta-doped LLZO in SEM with extended exposure time. Scale bars are 1 μm. With the extended exposure time, Li metal deposits on the LLZO surface and gradually grows. **b**, Li-rich phase deposition from Al, Ta-doped LLZO in HAADF-STEM. Scale bar is 40 nm. Black spots were observed to deposit along both sides of the GBs and in regions further away. These spots were identified as Li-rich phase, as they appear darker in HAADF imaging due to the low atomic number of Li, and no enrichment of other elements was detected at the corresponding locations in the STEM-EDS mapping of Fig. 1b. **c**, Li-rich phase deposition from Ga-doped LLZO in HAADF-STEM. Scale bar is 5 nm. Li-rich phase was observed to deposit along both sides of the GB, similar to the Al, Ta-LLZO. **d**-**f**, Li-rich phase deposition from Ga-doped LLZO in HAADF-STEM (**d**) (Scale bar is 10 nm), enlarged left side (**e**) (Scale bar is 5 nm) and enlarged right side (**f**) (Scale bar is 5 nm). Insets show lattice planes, and yellow and purple spheres represent La and Zr, respectively. The orientations of the grains forming either side of the GB were identified as 〈 111〉 and 〈110 〉. More Li-rich phase deposition was observed on the 〈111 〉 surface compared to 〈110〉, indicating that Li is more readily reduced from 〈111〉.

**Supplementary Fig. 7**| **MLFF-MD for Li vacancy formation energy.** **a**-**c,** GB Σ17 (530) [001] (**a**), Li vacancy formation energies with Ta segregation and no segregation (**b**) and RDFs at bulk and GB (**c**). **d**-**f,** GB Σ33 (52-2) [011] (**d**), Li vacancy formation energies with Ta segregation and no segregation (**e**) and RDFs at bulk and GB (**f**). (**g**) RDFs at bulk and GB in Σ19 (32-5) [111]. Green, yellow, cyan, purple, and blue spheres represent Li, La, Ta, Zr, and O, respectively.

**Supplementary Fig. 8** | **Rate performance.** Rate performance of full cells incorporating S-LLZO pellets tested at RT.

**Supplementary Fig. 9** | **MLFF validation.** Comparison of energy (top left) and force components (top right) between DFT calculations and predictions by the ML potential for Al-doped LLZO (R2 values are also shown), and the energy error (bottom left) and force RMSE (bottom right) as a function of simulation time for MD snapshots at 2000 K for (**a**,**c**,**e**,**g**) cubic and (**b**,**d**,**f**,**h**) amorphous [Li7-3*x*Al*x*]La3Zr2O12 with *x* = 0, 0.25, 0.5, and 0.75, respectively, with a unit cell for each system used for training. The error is defined as the difference in energy or force component values between ML prediction and DFT calculation. The force RMSE of each snapshot (i.e., at each time) was calculated using errors of 3N force components (where N is the number of atoms). MD snapshots were sampled every 1 ps. The black solid line is a guideline, and the red line shows the position of RMSE for 100 ps. Comparison of energy (top left) and force components (top right) between DFT calculations and predictions by the ML potential for Ta-doped LLZO (R2 values are also shown), and the energy error (bottom left) and force RMSE (bottom right) as a function of simulation time for MD snapshots at 2000 K for (**i**,**j**,**k**,**l**) cubic and (**m**,**n**,**o**,**p**) amorphous Li7-*x*La3[Zr2-*x*Ta*x*]O12 with *x* = 0, 0.25, 0.5, and 0.75, respectively, with a unit cell for each system used for training. The error is defined as the difference in energy or force component values between ML prediction and DFT calculation. The force RMSE of each snapshot (i.e., at each time) was calculated using errors of 3N force components (where N is the number of atoms). MD snapshots were sampled every 1 ps. The black solid line is a guideline, and the red line shows the position of RMSE for 100 ps.

**Supplementary Tab. 1** | **Formation energies.** Formation energies of Al, Ta and La in cubic and amorphous LLZO were calculated using elemental metals as reference, with the average energy obtained from 10 random doped structures for Al and Ta and 24 vacancy sites for La.

|  | | Cubic | Amorphous | Difference (∆Eform) |
| --- | --- | --- | --- | --- |
| Eform (eV/dopant) | Al | 2.12 | 1.17 | -0.95 |
| Ta | 2.28 | 2.41 | +0.12 |
| La | 12.34 | 9.83 | +2.50 |

**Supplementary Tab. 2** | **MLFF-MD for Ta and Al migration.** Activation energies of Al, Ta and La migrating in bulk and GB Σ17 (530) [001], Σ33 (52-2) [011] and Σ19 (32-5) [111].

|  | Ea of Al (eV) | Ea Ta (eV) | | Ea La (eV) |
| --- | --- | --- | --- | --- |
| Bulk | 0.645 | 0.619 | 0.248 | |
| Σ17 (530) [001] | 0.831 | 0.882 | 0.941 | |
| Σ33 (52-2) [011] | 0.974 | 0.873 | 1.007 | |
| Σ19 (32-5) [111] | 0.989 | 0.673 | 0.793 | |

**Supplementary Tab. 3** | **Comparison of conductivity.** Comparison of conductivity as a function of density and sintering methods. CS is conventional sintering, HPS is hot press sintering and SPS is spark plasma sintering.

| Methods | Relative density | Conductivity (mS/cm) | Chemical formula or dopant | Ref. |
| --- | --- | --- | --- | --- |
| CS | 93 | 0.0567 | Al | 1 |
| CS | 92.9 | 0.246 | Li7.06La3Zr1.94Sm0.06O12 | 2 |
| CS | 92 | 0.08 | Li7La3(ZrNb)O12 | 3 |
| CS | 96 | 0.31 | Li6.4La3Zr1.4Ta0.6O12 | 4 |
| CS | 94 | 0.467 | Li7La3Zr0.5Nb0.5Ta0.5Hf0.5O12 | 5 |
| CS | 97.4 | 0.694 | Ta | 6 |
| CS | 92.8 | 0.509 | Mo | 7 |
| CS | 94.5 | 1.36 | Ga | 8 |
| CS | 94 | 0.3 | Eu | 9 |
| CS | 90 | 0.5 | Ta | 10 |
| CS | 91.9 | 0.23 | Sb | 11 |
| CS | 93.0 | 0.353 | Ta, Sb | 11 |
| CS | 92.7 | 0.5 | Li6.4La3Zr1.4Ta0.6O12 | 11 |
| CS | 92.3 | 0.448 | Li6.4La3Zr1.4Nb0.3Ta0.3O12 | 11 |
| CS | 92.0 | 0.266 | Li6.4La3Zr1.4Nb0.6O12 | 11 |
| CS | 92 | 0.3 | Ta | 12 |
| CS | 94 | 0.522 | Nb | 13 |
| CS | 97 | 0.7 | Li6.5La3Zr1.5Nb0.5O12 | 14 |
| CS | 91.7 | 0.73 | Ta | 15 |
| CS | 92.7 | 0.63 | Ta | 15 |
| CS | 92.5 | 0.69 | Ta | 15 |
| CS | 92.8 | 0.46 | Ta | 15 |
| CS | 92.8 | 0.47 | Ta | 15 |
| CS | 93.6 | 0.40 | Ta | 15 |
| CS | 94.1 | 0.28 | Ta | 15 |
| CS | 95.0 | 0.35 | Ta | 15 |
| CS | 93.8 | 0.034 | Ta | 15 |
| CS | 96 | 0.645 | Ta | 16 |
| CS | 98 | 0.5 | Al | 17 |
| CS | 95 | 0.46 | Al | 18 |
| CS | 94 | 0.2 | Al | 19 |
| CS | 97 | 1.09 | Ta | 20 |
| CS | 92 | 0.1 | Ta | 21 |
| CS | 97 | 0.517 | Ta | 22 |
| CS | 92.1 | 0.33 | Al | 23 |
| CS | 92.9 | 0.82 | Fe | 23 |
| CS | 94.4 | 1.31 | Ga | 23 |
| CS | 94.1 | 0.668 | Si | 24 |
| CS | 97.54 | 0.618 | Li6.4La3Zr1.4Ta0.6O12 | 25 |
| CS | 94 | 1.2 | Li6.4Ga0.2La3Zr2O12 | 26 |
| CS | 97 | 0.6 | Nb | 27 |
| CS | 96 | 0.448 | Al | 28 |
| CS | 96 | 0.647 | Li6.4La3Zr1.4Ta0.6O12 | 29 |
| CS | 97.5 | 1.24 | Li6.4Ga0.2La3Zr2O12 | 30 |
| CS | 95.4 | 1.09 | Li6.4Ga0.2La3Zr2O12 | 31 |
| CS | 98 | 1 | Li6.4La3Zr1.4Ta0.6O12 | 32 |
| CS | 97 | 0.85 | Li6.5La3Zr1.5Ta0.5O12 | 33 |
| CS | 94.25 | 0.45 | Al | 34 |
| CS | 96.2 | 0.853 | Ta | 35 |
| CS | 90 | 0.36 | Li6.8La2.95Ca0.05Zr1.75Nb0.25O12 | 36 |
| CS | 93.4 | 0.87 | Ga | 37 |
| CS | 94.1 | 1.46 | Ga | 37 |
| CS | 96.3 | 1.12 | Ga | 37 |
| CS | 95.1 | 0.71 | Ga | 37 |
| CS | 92.8 | 0.57 | Ga | 37 |
| HPS | 98 | 0.34 | Li6.19Al0.27La3Zr2O12 | 38 |
| HPS | 98 | 1.2–1.75 | Ga | 39 |
| HPS | 97 | 0.46 | Li6.25La3Zr2Al0.25O12 | 40 |
| HPS | 91 | 0.35 | Li6.25La3Zr2Ga0.25O12 | 41 |
| HPS | 99 | 0.37 | Li5.95La3Zr2Al0.35O12 | 42 |
| HPS | 97.5 | 1.13 | Li6.55Ga0.15La3Zr2O12 | 43 |
| HPS | 97 | 0.5 | Li6.25Al0.25La3Zr2O12 | 44 |
| HPS | 98 | 0.52 | Li6.25Al0.25La3Zr2O12 | 45 |
| HPS | 98 | 0.4 | Li6.28Al0.24La3Zr2O12 | 46 |
| HPS | 99.7 | 0.61 | Ta | 47 |
| HPS | 99 | 0.74 | Li7La3Zr1.5Nb0.5O12 | 48 |
| HPS | 99.4 | 0.57 | Li6.25Al0.25La3Zr2O12 | 49 |
| HPS | 99 | 0.84 | Li6.6La3Zr1.6Ta0.4O12 | 50 |
| HPS | 97 | 0.4 | Ta | 51 |
| HPS | 97.3 | 1.3 | Ga | 52 |
| HPS | 99.5 | 0.66 | Ta | 53 |
| SPS | 99.8 | 0.57 | Al | 54 |
| SPS | 99 | 0.31 | Li6.25Al0.25La3Zr2O12 | 55 |
| SPS | 95 | 0.643 | Li6.65La2.95Sr0.05Zr1.8Mo0.2O12 | 56 |
| SPS | 99.8 | 0.651 | Al | 57 |
| SPS | 93 | 0.33 | Al | 58 |
| SPS | 95.5 | 0.69 | Ta | 59 |
| SPS | 99 | 1.1 | Li6.6La3Zr1.6Ta0.4O12 | 60 |
| SPS | 96 | 0.917 | Li6.4La3Zr1.4Ta0.6O12 | 61 |
| SPS | 99.2 | 0.48 | Li6.75La3Al0.25Zr2O12 | 62 |
| SPS | 96 | 0.16 | Al | 63 |

**Supplementary Tab. 4** | **Comparison of activation energies.** Comparison of activation energies of Li migrating in bulk and GBs with and without Ta segregation.

|  | No segregation (eV) | Ta segregation (eV) |
| --- | --- | --- |
| Bulk | 0.23 |  |
| Σ17 (530) [001] | 0.32 | 0.33 |
| Σ33 (52-2) [011] | 0.37 | 0.35 |
| Σ19 (32-5) [111] | 0.32 | 0.35 |

**Supplementary Tab. 5** | **Comparison of stripping/plating capacities.** Comparison of reported CCDs and CCD capacities of pristine (unmodified) LLZOs, as well as total accumulated capacities during galvanostatic cycling.

|  | CCD  (mA cm-2) | CCD test time (h) | Cycling time (h) | Accumulated cycling capacities (mAh g-1) | Tem. (℃) | Ref. |
| --- | --- | --- | --- | --- | --- | --- |
| Li6.76Al0.24La3Zr2O12 | 0.35 | 0.5 | ~140 | ~6.25 | 25 | 64 |
| Li6.45Al0.05La3Zr1.6Ta0.4O12 | 0.3185 | 0.5 |  |  | 50 | 65 |
| Li6.25La3Zr2Al0.25O12 | 0.93 | 0.215 |  |  | 25 | 66 |
| Li6.25La3Zr2Al0.25O12 | 0.05 | 0.3 |  |  | 30 | 40 |
| Ta-doped LLZO | 0.44 | 0.5 |  |  | RT | 67 |
| Li6.1Ga0.3La3Zr2O12 | 0.32 | 0.6 | 30 | 3 | 25 | 68 |
| Li6.5La3Zr1.5Ta0.5O12 | 0.5 | 0.5 | ~1000 | ~25 | RT | 69 |
| Li6.5La3Zr1.5Ta0.5O12 | 0.8 | 0.3125 |  |  | RT | 70 |
| Li6.5La3Zr1.5Ta0.5O12 | 0.9 | 0.222 |  |  | RT | 71 |
| Li6.5La3Zr1.5Ta0.5O12 | 6.0 | 0.0333 | ~700 | 702 | 60 | 71 |
| Al-doped LLZO | 0.134 | 0.5 |  |  | RT | 72 |
| Li6.5La3Zr1.5Ta0.5O12 | 0.1 | 0.5 |  |  | 25 | 73 |
| Li6.5La3Zr1.5Ta0.5O12 | 0.6 | 0.667 |  |  | 25 | 74 |
| Li6.25Al0.25La3Zr2O12 | 0.6 | 0.5 |  |  | RT | 49 |
| Al-doped LLZO | 0.62 | 0.1 |  |  | RT | 75 |
|  |  |  | 2500 | ~260 | 70 | 75 |
| Li6.4Ga0.2La3Zr2O12 | 0.28 | 0.333 |  |  | 20 | 76 |
| Li6.5La3Zr1.5Ta0.5O12 | 0.4 | 0.5 | ~50 | ~7.5 | 25 | 77 |
| Li6.25Ga0.25La3Zr2O12 | 0.55 | 0.5 |  |  |  | 78 |
| Li6.1Ga0.3La3Zr2O12 | 0.58 | 0.4 | 60 | 6 | RT | 79 |
| Al-doped LLZO | 12.5 | 0.08 | 250 | 125 | 75 | 80 |
| Ta-doped LLZO | 1.15 | 0.5 | ~575 | ~56.25 | 25 | 29 |
| Al-doped LLZO | 0.64 | 0.156 | 575 | ~28.75 | RT | 81 |
| Li6.25Ga0.25La3Zr2O12 | 0.7 | 0.5 | 1000 | 100 | RT | 82 |
| Ta-Doped LLZO | 0.1 | 0.5 | 200 | 15 | RT | 83 |
| Li6.6La3Zr1.6Ta0.4O12 | 0.7 | 0.5 | 150 | 6 | RT | 84 |

**Supplementary Tab. 6 | MLFF validation.** Energy (meV/atom) and force (eV/Å) errors of snapshots from MLMD simulations at 2000 K versus DFT. “Unseen” indicates that the ML model did not learn the systems. The doping level is indicated by the stoichiometry x in [Li7-3xAlx]La3Zr2O12 and Li7-xLa3[Zr2-xTax]O12. Values in parenthesis are R2 (see Supplementary Fig. 8 for detailed data).

| **System type** | | **Energy** | **Force** |
| --- | --- | --- | --- |
| Al-LLZO  Cubic | *x* = 0 | 5.4 (1.0) | 0.11 (0.99) |
| *x* = 0.25 | 1.5 (0.99) | 0.12 (0.99) |
| *x* = 0.50 | 5.2 (0.99) | 0.12 (0.99) |
| *x* = 0.75 | 6.1 (0.99) | 0.15 (0.99) |
| Al-LLZO Amorphous | *x* = 0 | 2.6 (0.99) | 0.15 (0.99) |
| *x* = 0.25 | 2.5 (0.99) | 0.16 (0.99) |
| *x* = 0.50 | 2.5 (0.99) | 0.16 (0.99) |
| *x* = 0.75 | 3.3 (0.99) | 0.17 (0.99) |
| Ta-LLZO  Cubic | *x* = 0 | 6.0 (1.0) | 0.11 (0.99) |
| *x* = 0.25 | 5.6 (1.0) | 0.11 (0.99) |
| *x* = 0.50 | 5.4 (0.99) | 0.12 (0.99) |
| *x* = 0.75 | 5.4 (0.99) | 0.12 (0.99) |
| Ta-LLZO Amorphous | *x* = 0 | 3.3 (0.99) | 0.16 (0.99) |
| *x* = 0.25 | 3.1 (0.99) | 0.16 (0.99) |
| *x* = 0.50 | 3.0 (0.99) | 0.17 (0.99) |
| *x* = 0.75 | 2.9 (0.99) | 0.18 (0.98) |

**Supplementary Tab. 7 | Continuum simulation parameters.**

| Parameter | Value |
| --- | --- |
| ‍Li bulk concentration | 6.45 per unit cell |
| ‍σ | 7.3*10-4 S/cm |
| ‍εr | 12085 |
| ‍GB width | 1.6 nm |

**References**

1. Zhao, P. *et al.* A novel method for preparation of high dense tetragonal Li7La3Zr2O12. *J. Power Sources* **344**, 56-61 (2017).

2. Wang, X. *et al.* High lithium ionic conductivity of garnet-type oxide Li7+xLa3Zr2-xSmxO12 (x = 0-0.1) ceramics. *Mater. Lett.* **231**, 43-46 (2018).

3. Rosero-Navarro, N. C., Yamashita, T., Miura, A., Higuchi, M. & Tadanaga, K. Effect of Sintering Additives on Relative Density and Li-ion Conductivity of Nb-Doped Li7La3ZrO12 Solid Electrolyte. *J. Am. Ceram. Soc.* **100**, 276-285 (2017).

4. Zhang, K. *et al.* Unveiling the roles of alumina as a sintering aid in Li-Garnet solid electrolyte. *Int. J. Energy Res.* **44**, 9177-9184 (2020).

5. Fu, Z. & Ferguson, J. Processing and characterization of an Li7La3Zr0.5Nb0.5Ta0.5Hf0.5O12 high-entropy Li-garnet electrolyte. *J. Am. Ceram. Soc.* **105**, 6175-6183 (2022).

6. Zheng, H., Li, G., Liu, H., Wu, Y. & Duan, H. Influence of dry- and wet-milled LLZTO particles on the sintered pellets. *J. Am. Ceram. Soc.* **106**, 274-284 (2023).

7. Liu, X. *et al.* High lithium ionic conductivity in the garnet-type oxide Li7-2xLa3Zr2-xMoxO12 (x=0-0.3) ceramics by sol-gel method. *J. Am. Ceram. Soc.* **100**, 1527-1533 (2017).

8. Xiang, X. *et al.* Effect of Li2O excess in Li6.4Ga0.2La3Zr2O12 electrolyte for all-solid-state Li-ion batteries. *Int. J. Appl. Ceram. Technol.* **20**, 321-328 (2023).

9. Salimkhani, H., Erdem, E., Alkan Gursel, S. & Yurum, A. Unveiling the presence of mixed oxidation states of Europium in Li7+δEuxLa3-δZr2-δO12-δ garnet and its impact on the Li-ion conductivity. *J. Am. Ceram. Soc.* **104**, 4257-4271 (2021).

10. Weller, J. M., Dopilka, A. & Chan, C. K. Observation of Elemental Inhomogeneity and Its Impact on Ionic Conductivity in Li-Conducting Garnets Prepared with Different Synthesis Methods. *Adv. Energy and Sust. Res.* **2**, 2000109 (2021).

11. Xiang, X. *et al.* Dual regulation of Li+ migration of Li6.4La3Zr1.4M0.6O12 (M = Sb, Ta, Nb) by bottleneck size and bond length of M-O. *J. Am. Ceram. Soc.* **103**, 2483-2490 (2020).

12. Murugan, R., Thangadurai, V. & Weppner, W. Fast Lithium Ion Conduction in Garnet-Type Li7La3Zr2O12. *Angew. Chem. Int. Ed.* **46**, 7778-7781 (2007).

13. Zhao, P. *et al.* Garnet-like Li7-xLa3Zr2-xNbxO12 (x = 0-0.7) solid state electrolytes enhanced by self-consolidation strategy. *J. Eur. Ceram. Soc.* **38**, 5454-5462 (2018).

14. Lu, W., Wang, T., Xue, M. & Zhang, C. Improved Li6.5La3Zr1.5Nb0.5O12 electrolyte and effects of atmosphere exposure on conductivities. *J. Power Sources* **497**, 229845 (2021).

15. Wang, Y. & Lai, W. High Ionic Conductivity Lithium Garnet Oxides of Li7−xLa3Zr2−xTaxO12 Compositions. *Electrochem. Solid State Lett.* **15**, A68 (2012).

16. Xia, W. *et al.* Reaction mechanisms of lithium garnet pellets in ambient air: The effect of humidity and CO2. *J. Am. Ceram. Soc.* **100**, 2832-2839 (2017).

17. Dubey, R. *et al.* Building a Better Li-Garnet Solid Electrolyte/Metallic Li Interface with Antimony. *Adv. Energy Mater.* **11**, 2102086 (2021).

18. Krauskopf, T., Mogwitz, B., Rosenbach, C., Zeier, W. G. & Janek, J. Diffusion Limitation of Lithium Metal and Li-Mg Alloy Anodes on LLZO Type Solid Electrolytes as a Function of Temperature and Pressure. *Adv. Energy Mater.* **9**, 1902568 (2019).

19. Yi, E., Wang, W., Kieffer, J. & Laine, R. M. Flame made nanoparticles permit processing of dense, flexible, Li+ conducting ceramic electrolyte thin films of cubic-Li7La3Zr2O12 (c-LLZO). *J. Mater. Chem. A* **4**, 12947-12954 (2016).

20. Lu, Y. et al. An in situ element permeation constructed high endurance Li-LLZO interface at high current densities. *J. Mater. Chem. A* **6**, 18853-18858 (2018).

21. Shen, F., Dixit, M. B., Xiao, X. & Hatzell, K. B. Effect of Pore Connectivity on Li Dendrite Propagation within LLZO Electrolytes Observed with Synchrotron X-ray Tomography. *ACS Energy Lett.* **3**, 1056-1061 (2018).

22. Huang, X. *et al.* Preparation of dense Ta-LLZO/MgO composite Li-ion solid electrolyte: Sintering, microstructure, performance and the role of MgO. *J. Energy Chem.* **39**, 8-16 (2019).

23. Xiang, X. *et al.* Crystal structure and lithium ionic transport behavior of Li site doped Li7La3Zr2O12. *J. Eur. Ceram. Soc.* **40**, 3065-3071 (2020).

24. Ma, X. *et al.* Garnet Si-Li7La3Zr2O12 electrolyte with a durable, low resistance interface layer for all-solid-state lithium metal batteries. *J. Power Sources* **453**, 227881 (2020).

25. Shen, F. *et al.* A Simple and Highly Efficient Method toward High-Density Garnet-Type LLZTO Solid-State Electrolyte. *ACS Appl. Mater. Interfaces* **12**, 30313-30319 (2020).

26. Huang, X. *et al.* Synthesis of Ga-doped Li7La3Zr2O12 solid electrolyte with high Li+ ion conductivity. *Ceram. Int.* **47**, 2123-2130 (2021).

27. Huang, X., Song, Z., Xiu, T., Badding, M. E. & Wen, Z. Sintering, micro-structure and Li+ conductivity of Li7-xLa3Zr2-xNbxO12/MgO (x = 0.2-0.7) Li-Garnet composite ceramics. *Ceram. Int.* **45**, 56-63 (2019).

28. Xia, W. *et al.* Ionic Conductivity and Air Stability of Al-Doped Li7La3Zr2O12 Sintered in Alumina and Pt Crucibles. *ACS Appl. Mater. Interfaces* **8**, 5335-5342 (2016).

29. Huang, X. *et al.* None-Mother-Powder Method to Prepare Dense Li-Garnet Solid Electrolytes with High Critical Current Density. *ACS Appl. Energy Mater.* **1**, 5355-5365 (2018).

30. Su, J. *et al.* Overcoming the abnormal grain growth in Ga-doped Li7La3Zr2O12 to enhance the electrochemical stability against Li metal. *Ceram. Int.* **45**, 14991-14996 (2019).

31. Xiang, X., Chen, F., Shen, Q., Zhang, L. & Chen, C. Effect of the lithium ion concentration on the lithium ion conductivity of Ga-doped LLZO. *Mater. Res. Express* **6**, 085546 (2019).

32. Huang, X. *et al.* Manipulating Li2O atmosphere for sintering dense Li7La3Zr2O12 solid electrolyte. *Energy Storage Mater.* **22**, 207-217 (2019).

33. Yang, L. *et al.* Rapid sintering method for highly conductive Li7La3Zr2O12 ceramic electrolyte. *Ceram. Int.* **46**, 10917-10924 (2020).

34. Xu, B. *et al.* Multistep sintering to synthesize fast lithium garnets. *J. Power Sources* **302**, 291-297 (2016).

35. Ren, Y., Shen, Y., Lin, Y. & Nan, C.-W. Microstructure Manipulation for Enhancing the Resistance of Garnet-Type Solid Electrolytes to “Short Circuit” by Li Metal Anodes. *ACS Appl. Mater. Interfaces* **11**, 5928-5937 (2019).

36. Ohta, S. *et al.* Co-sinterable lithium garnet-type oxide electrolyte with cathode for all-solid-state lithium ion battery. *J. Power Sources* **265**, 40-44 (2014).

37. Wu, J.-F. *et al.* Gallium-Doped Li7La3Zr2O12 Garnet-Type Electrolytes with High Lithium-Ion Conductivity. *ACS Appl. Mater. Interfaces* **9**, 1542-1552 (2017).

38. Kim, Y. *et al.* The Effect of Relative Density on the Mechanical Properties of Hot-Pressed Cubic Li7La3Zr2O12. *J. Am. Ceram. Soc.* **99**, 1367-1374 (2016).

39. Yang, S. H. *et al.* Ionic conductivity of Ga-doped LLZO prepared using Couette-Taylor reactor for all-solid lithium batteries. *J. Ind. Eng. Chem.* **56**, 422-427 (2017).

40. Sharafi, A., Meyer, H. M., Nanda, J., Wolfenstine, J. & Sakamoto, J. Characterizing the Li-Li7La3Zr2O12 interface stability and kinetics as a function of temperature and current density. *J. Power Sources* **302**, 135-139 (2016).

41. Wolfenstine, J., Ratchford, J., Rangasamy, E., Sakamoto, J. & Allen, J. L. Synthesis and high Li-ion conductivity of Ga-stabilized cubic Li7La3Zr2O12. *Mater. Chem. Phys.* **134**, 571-575 (2012).

42. David, I. N., Thompson, T., Wolfenstine, J., Allen, J. L. & Sakamoto, J. Microstructure and Li-Ion Conductivity of Hot-Pressed Cubic Li7La3Zr2O12. *J. Am. Ceram. Soc.* **98**, 1209-1214 (2015).

43. Qin, S. *et al.* Extremely dense microstructure and enhanced ionic conductivity in hot-isostatic pressing treated cubic garnet-type solid electrolyte of Ga2O3-doped Li7La3Zr2O12. *Funct. Mater. Lett.* **11**, 1850029 (2018).

44. Sharafi, A. et al. Impact of air exposure and surface chemistry on Li-Li7La3Zr2O12 interfacial resistance. *J. Mater. Chem. A* **5**, 13475-13487 (2017).

45. Schmidt, R. D. & Sakamoto, J. In-situ, non-destructive acoustic characterization of solid state electrolyte cells. *J. Power Sources* **324**, 126-133 (2016).

46. Tenhaeff, W. E. *et al.* Resolving the Grain Boundary and Lattice Impedance of Hot-Pressed Li7La3Zr2O12 Garnet Electrolytes. *ChemElectroChem* **1**, 375-378 (2014).

47. Zhang, J., Li, J., Zhai, H., Tan, G. & Tang, X. One-Step Processing of Soft Electrolyte/Metallic Lithium Interface for High-Performance Solid-State Lithium Batteries. *ACS Appl. Energy Mater.* **3**, 6139-6145 (2020).

48. Lee, H. C., Oh, N. R., Yoo, A. R., Kim, Y. & Sakamoto, J. Preparation of a Li7La3Zr1.5Nb0.5O12 Garnet Solid Electrolyte Ceramic by using Sol-gel Powder Synthesis and Hot Pressing and Its Characterization. *J. Korean Phys. Soc.* **73**, 1535-1540 (2018).

49. Sharafi, A., Haslam, C. G., Kerns, R. D., Wolfenstine, J. & Sakamoto, J. Controlling and correlating the effect of grain size with the mechanical and electrochemical properties of Li7La3Zr2O12 solid-state electrolyte. *J. Mater. Chem. A* **5**, 21491-21504 (2017).

50. Nonemacher, J. F. *et al.* Fracture toughness of single grains and polycrystalline Li7La3Zr2O12 electrolyte material based on a pillar splitting method. *J. Eur. Ceram. Soc.* **40**, 3057-3064 (2020).

51. Thompson, T. *et al.* A Tale of Two Sites: On Defining the Carrier Concentration in Garnet-Based Ionic Conductors for Advanced Li Batteries. *Adv. Energy Mater.* **5**, 1500096 (2015).

52. Bernuy-Lopez, C. *et al.* Atmosphere Controlled Processing of Ga-Substituted Garnets for High Li-Ion Conductivity Ceramics. *Chem. Mater.* **26**, 3610-3617 (2014).

53. Zhang, J. *et al.* Transformation of Undesired Li2CO3 into Lithiophilic Layer Via Double Replacement Reaction for Garnet Electrolyte Engineering. *Energy Environ. Mater.* **5**, 962-968 (2022).

54. Zhang, Y., Chen, F., Tu, R., Shen, Q. & Zhang, L. Field assisted sintering of dense Al-substituted cubic phase Li7La3Zr2O12 solid electrolytes. *J. Power Sources* **268**, 960-964 (2014).

55. Sazvar, A., Sarpoolaky, H. & Golmohammad, M. The effects of electric field on physical properties of LLZO made by flash sintering method. *Solid State Ion.* **386**, 116054 (2022).

56. Zhou, X. *et al.* Sr2+ and Mo6+ co-doped Li7La3Zr2O12 with superior ionic conductivity. *J. Alloys Compd.* **891**, 161906 (2022).

57. Zhang, Y. *et al.* High-purity and high-density cubic phase of Li7La3Zr2O12 solid electrolytes by controlling surface/volume ratio and sintering pressure. *Electrochim. Acta* **359**, 136965 (2020).

58. Botros, M., Djenadic, R., Clemens, O., Möller, M. & Hahn, H. Field assisted sintering of fine-grained Li7-3xLa3Zr2AlxO12 solid electrolyte and the influence of the microstructure on the electrochemical performance. *J. Power Sources* **309**, 108-115 (2016).

59. Yamada, H., Ito, T. & Hongahally Basappa, R. Sintering Mechanisms of High-Performance Garnet-type Solid Electrolyte Densified by Spark Plasma Sintering. *Electrochim. Acta* **222**, 648-656 (2016).

60. Dong, Z. *et al.* Dual Substitution and Spark Plasma Sintering to Improve Ionic Conductivity of Garnet Li7La3Zr2O12. *Nanomaterials* **9**, 721 (2019).

61. Zhao, B. *et al.* Interfacial modification enabled room temperature solid-state lithium-metal batteries. *Ionics* **27**, 1569-1578 (2021).

62. Zhao, X., Zhang, H., Yuan, Y., Ren, Y. & Wang, N. Ultra-fast and stable extraction of Li metal from seawater. *Chem. Commun.* **56**, 1577-1580 (2020).

63. Castillo, A. *et al.* Bulk Li mobility enhancement in Spark Plasma Sintered Li(7-3x)AlxLa3Zr2O12 garnet. *Ceram. Int.* **44**, 18844-18850 (2018).

64 Dussart, T. *et al.* Critical Current Density Limitation of LLZO Solid Electrolyte: Microstructure vs Interface. *J. Electrochem. Soc.* **168**, 120550 (2021).

65 Rosen, M. *et al.* Controlling the lithium proton exchange of LLZO to enable reproducible processing and performance optimization. *J. Mater. Chem. A* **9**, 4831-4840 (2021).

66 Wang, M., Wolfenstine, J. B. & Sakamoto, J. Temperature dependent flux balance of the Li/Li7La3Zr2O12 interface. *Electrochim. Acta* **296**, 842-847 (2019).

67 Chen, S. *et al.* The Influence of Surface Chemistry on Critical Current Density for Garnet Electrolyte. *Adv. Funct. Mater.* **32**, 2113318 (2022).

68 Sim, J.-W. *et al.* Controlling Dendrite Formation for Long-Term Cyclability and Fast Li+ Diffusion Kinetics in Solid-State Electrolyte Li7La3Zr2O12. *Chem. Mater.* **35**, 6538-6548 (2023).

69 Cai, M. *et al.* In-situ constructed lithium-salt lithiophilic layer inducing bi-functional interphase for stable LLZO/Li interface. *Energy Storage Mater.* **47**, 61-69 (2022).

70 Valle, J. M. & Sakamoto, J. The effect of lanthanoid defects on anionic solvation of Li in Li6.5La2+xZr1.5Ta0.5O12 from x = 0 to x = 1.2 garnet. *Solid State Ion.* **345**, 115170 (2020).

71 Taylor, N. J. *et al.* Demonstration of high current densities and extended cycling in the garnet Li7La3Zr2O12 solid electrolyte. *J. Power Sources* **396**, 314-318 (2018).

72 Cheng, L. *et al.* Effect of Surface Microstructure on Electrochemical Performance of Garnet Solid Electrolytes. *ACS Appl. Mater. Interfaces* **7**, 2073-2081 (2015).

73 Basappa, R. H., Ito, T. & Yamada, H. Contact between Garnet-Type Solid Electrolyte and Lithium Metal Anode: Influence on Charge Transfer Resistance and Short Circuit Prevention. *J. Electrochem. Soc.* **164**, A666 (2017).

74 Hongahally Basappa, R. *et al.* Grain boundary modification to suppress lithium penetration through garnet-type solid electrolyte. *J. Power Sources* **363**, 145-152 (2017).

75 Zhang, H. *et al.* Unveiling Surface Chemistry of Ultrafast-Sintered LLZO Solid-State Electrolytes for High-Performance Li-Garnet Solid-State Batteries. *Chem. Mater.* **36**, 11254-11263 (2024).

76 Flatscher, F., Philipp, M., Ganschow, S., Wilkening, H. M. R. & Rettenwander, D. The natural critical current density limit for Li7La3Zr2O12 garnets. *J. Mater. Chem. A* **8**, 15782-15788 (2020).

77 Zheng, C. *et al.* Grain Boundary Engineering Enabled High-Performance Garnet-Type Electrolyte for Lithium Dendrite Free Lithium Metal Batteries. *Small Methods* **6**, 2200667 (2022).

78 Gao, M. *et al.* Constructing a Multifunctional Interlayer toward Ultra-High Critical Current Density for Garnet-Based Solid-State Lithium Batteries. *Adv. Funct. Mater.* **33**, 2300319 (2023).

79 Lee, R.-H. & Lee, S.-H. Regulating the grain size of garnet type Ga0.3Li6.1La3Zr2O12 for ultrafast Li+ diffusion and enhanced cycling performance. *J. Energy Storage* **72**, 107421 (2023).

80 Okur, F. *et al.* Ultrafast Sintering of Dense Li7La3Zr2O12 Membranes for Li Metal All-Solid-State Batteries. *Adv. Sci.* **12**, 2412370 (2025).

81 Zhang, H. *et al.* On High-Temperature Thermal Cleaning of Li7La3Zr2O12 Solid-State Electrolytes. *ACS Appl. Energy Mater.* **6**, 6972-6980 (2023).

82 Zhao, G., Luo, C. & Hua, Q. Enhanced comprehensive performance of the LLZO series solid electrolyte via multifunctional additive. *J. Eur. Ceram. Soc.* **44**, 2251-2260 (2024).

83 Guo, J. & Chan, C. K. Lithium Dendrite Propagation in Ta-Doped Li7La3Zr2O12 (LLZTO): Comparison of Reactively Sintered Pyrochlore-to-Garnet vs LLZTO by Solid-State Reaction and Conventional Sintering. *ACS Appl. Mater. Interfaces* **16**, 4519-4529 (2024).

84 Tsai, C.-L. *et al.* Li7La3Zr2O12 Interface Modification for Li Dendrite Prevention. *ACS Appl. Mater. Interfaces* **8**, 10617-10626 (2016).

85. Posch, P. et al. Ion dynamics in Al-Stabilized Li7La3Zr2O12 single crystals-Macroscopic transport and the elementary steps of ion hopping. *Energy Storage Mater.* **24**, 220-228 (2020).
